# Supplementary material for: Hybrid analytical-numerical approach for investigation of differential effects in normal and cancer cells under electroporation
Source: Royal Society of Chemistry journal article supplement (doi:10.1039/c9ra07428g), 2019-01-01
Supplement: c9ra07428g1.pdf [file c9ra07428g1.pdf]

## Electronic supplementary information:

### Hybrid analytical-numerical approach for investigation of differential effects in normal and cancer cells under electroporation

Muhammad Awais Aslam<sup>1,2</sup>, Kashif Riaz<sup>1,2,3</sup>, Muhammad Qasim Mahmood<sup>1</sup>, Muhammad Zubair<sup>1,4</sup>

<sup>1</sup>Electrical Engineering Department, Information Technology University, 54000 Lahore, Pakistan.

<sup>2</sup>Co-first authors with equal contribution. <sup>3</sup>kashif.riaz@itu.edu.pk, <sup>4</sup>muhammad.zubair@itu.edu.pk

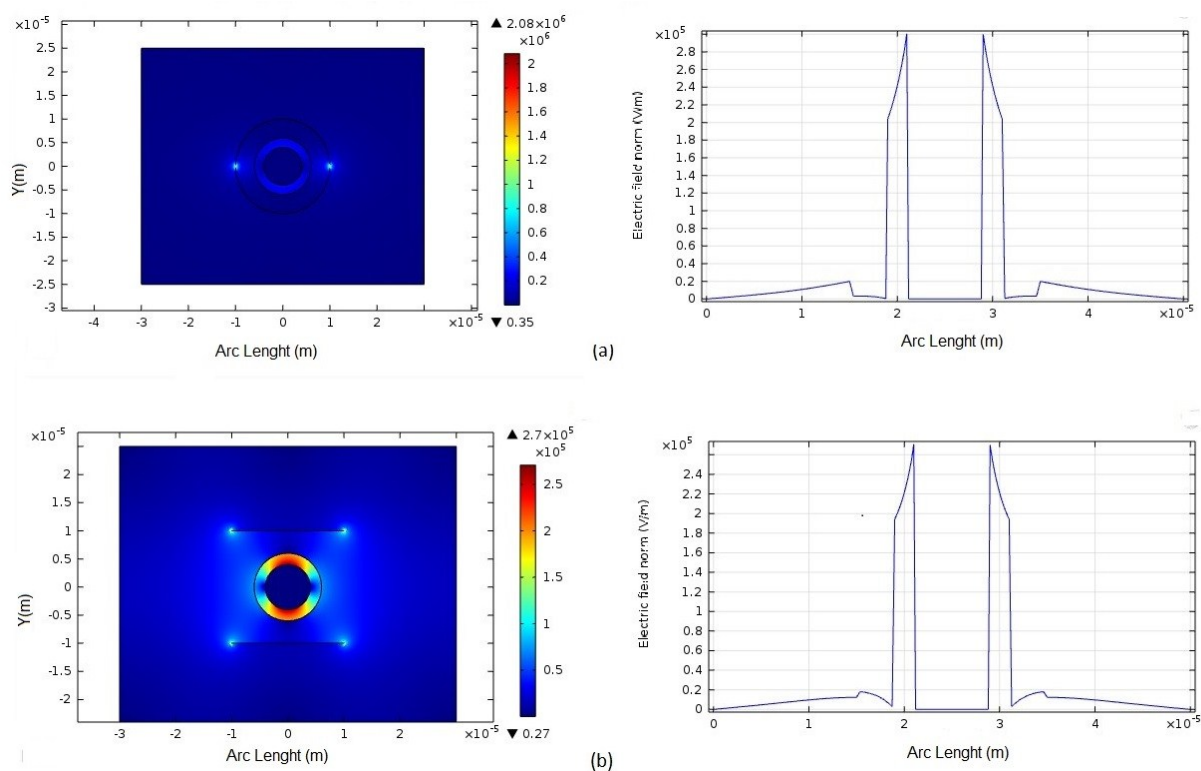

Supplementary Figure 1: Electric field distribution (V/m) of planner and circular electrodes at 1V incorporating MCF-10A. (a) circular electrodes' surface plot and 1-D plot of uniform normalized electric field. (b) planner electrodes' surface plot and 1-D plot of uniform normalized electric field.

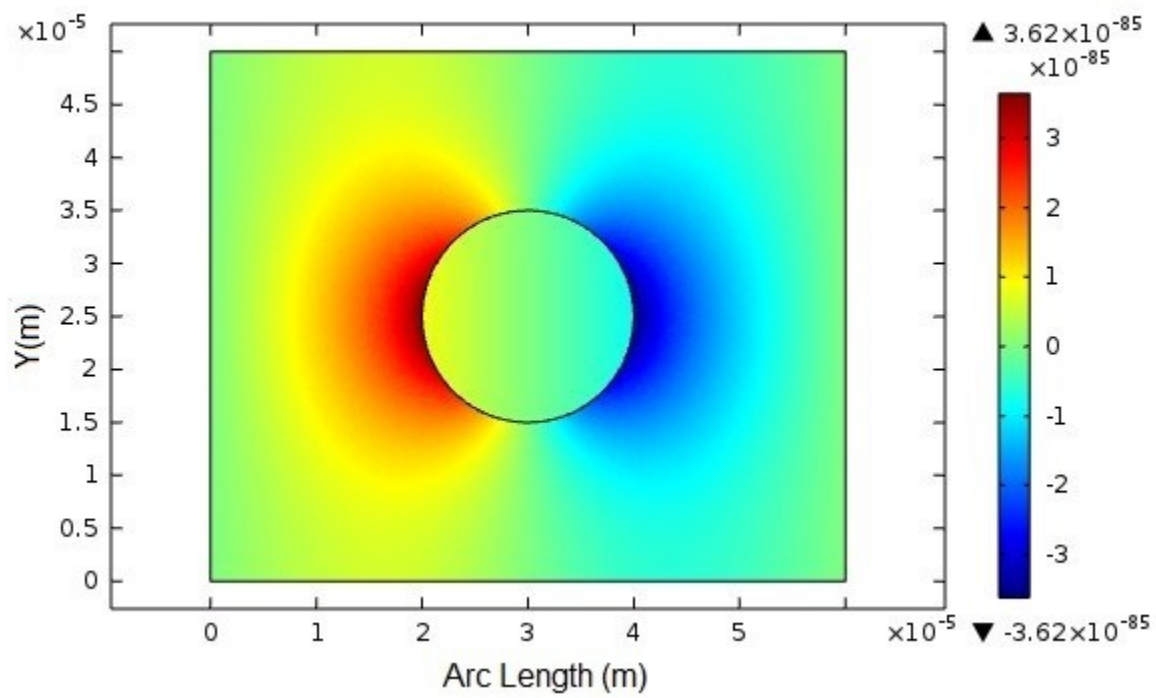

Supplementary Figure 2: Visualization of electric potential (V) stress on cell surface with 4s rectangular applied pulse using piecewise function with 30V amplitude. The membrane conductivity is in the range of  $10^{-6}$  S/m.

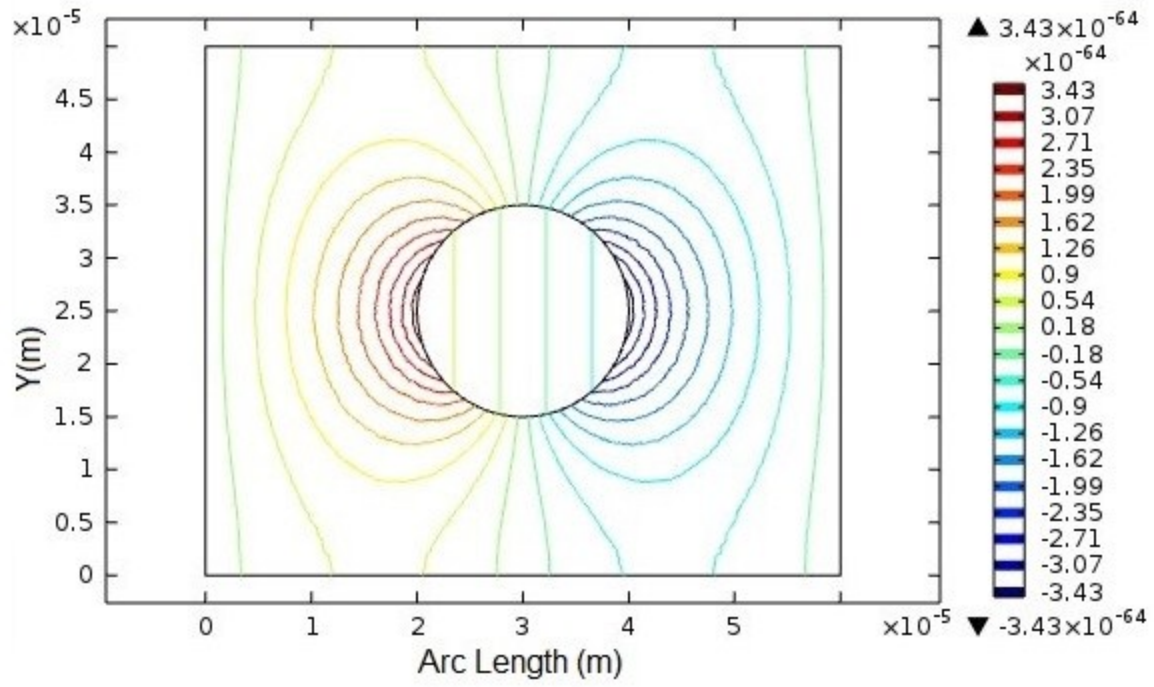

Supplementary Figure 3: contour plot of electric potential (V) stress with 4s rectangular applied pulse using piecewise function with 30V amplitude. The membrane conductivity is in the range of  $10^{-6}$  S/m.

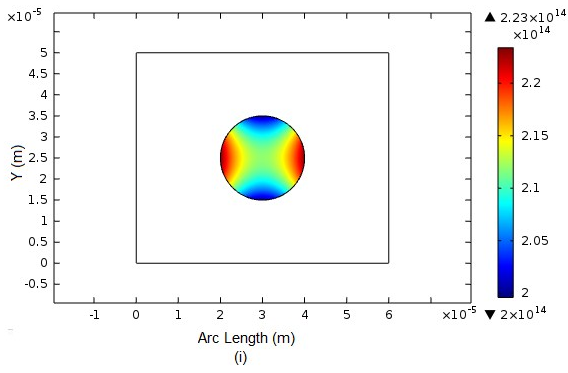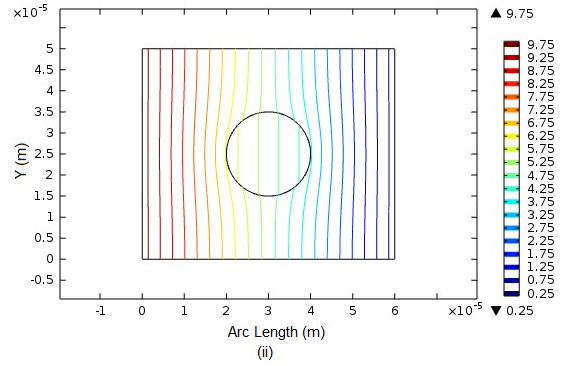

(a)

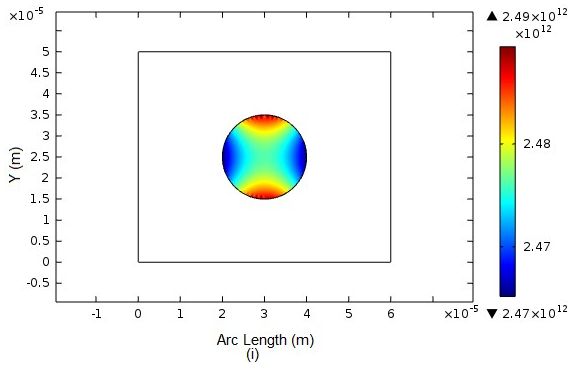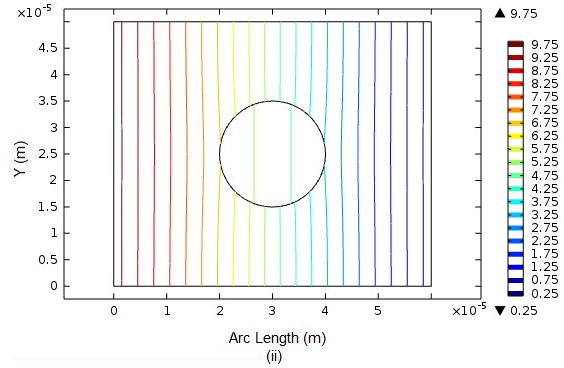

(b)

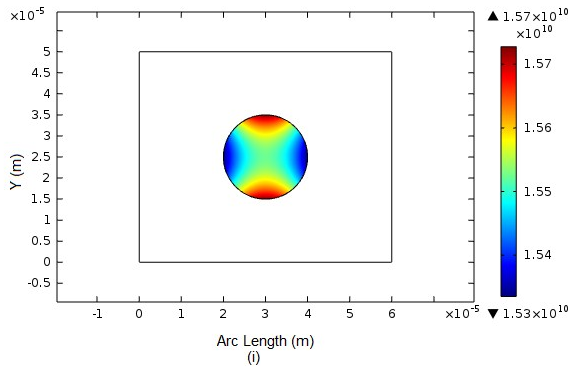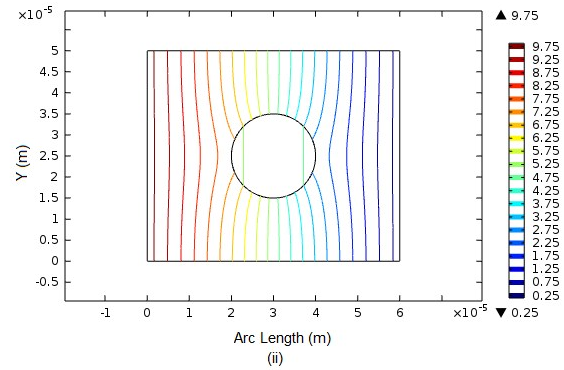

(c)

*Supplementary Figure 4:* Representing the trend of pore densities and electric potential as the membrane conductivity is decreased for MCF-10A at 10V. a) (i) Pore density's surface plot and (ii) electric potential contour at  $10^{-3}$  S/m conductivity. b) At membrane conductivity of  $10^{-4}$  S/m. c) At membrane conductivity of  $10^{-6}$  S/m (realistic membrane conductivity).

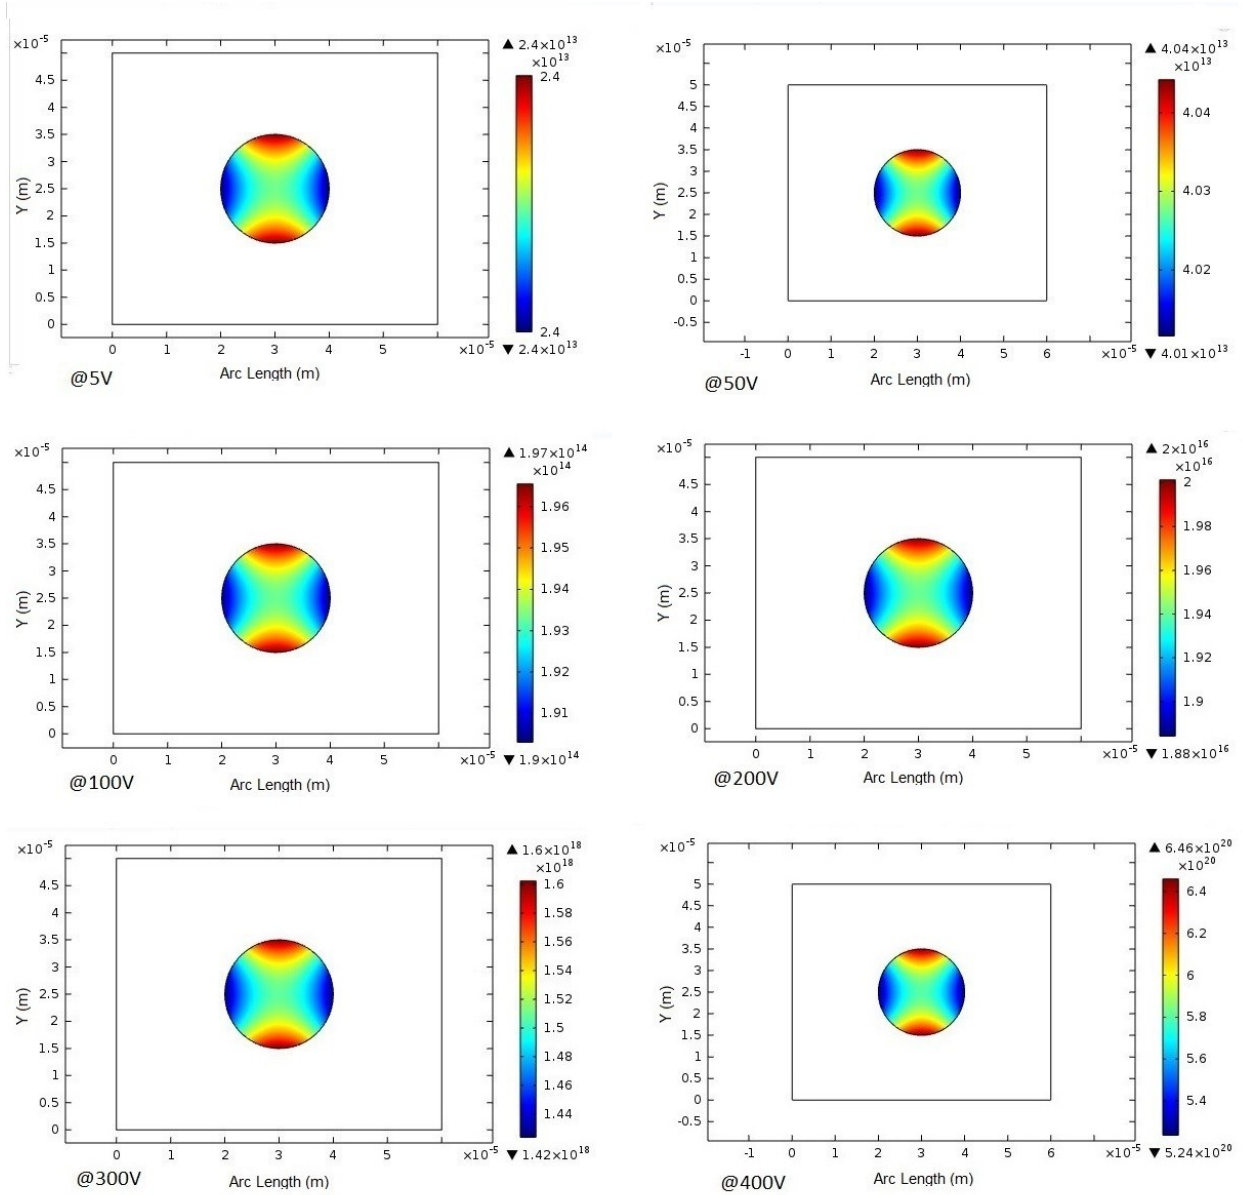

Supplementary Figure 5: Represents effect of electric potential applied on electroporation or pore densities of MCF-7.

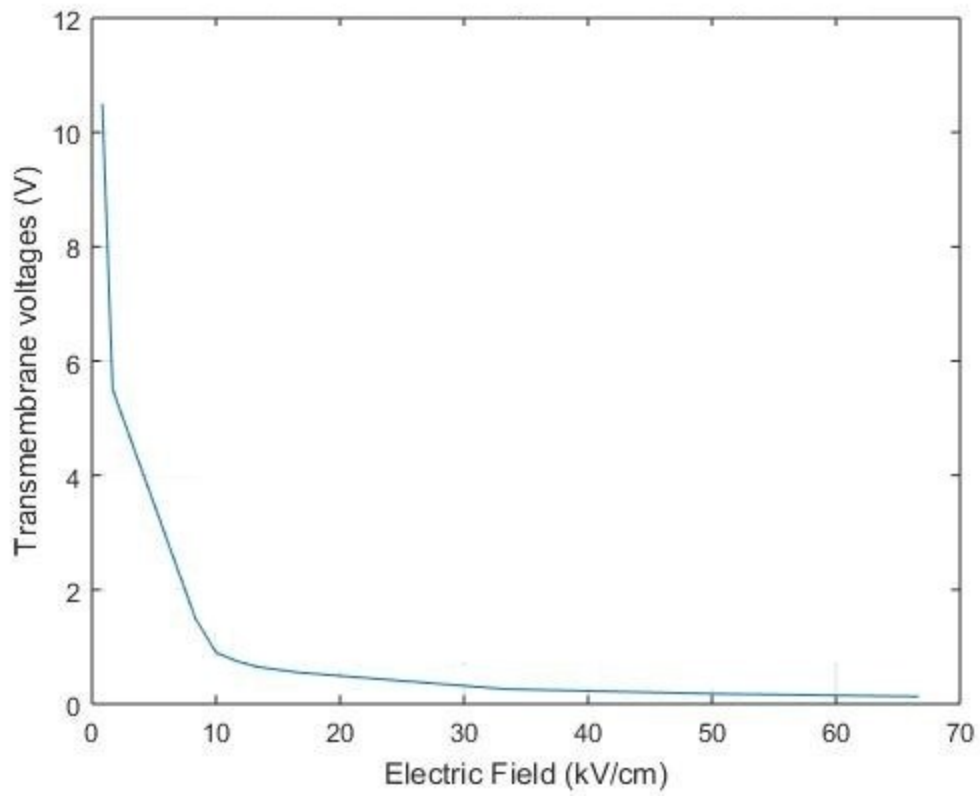

Supplementary Figure 6: Transmembrane voltage reduction plot of MCF-7 as we increase electric potential because of the increase in pore densities.

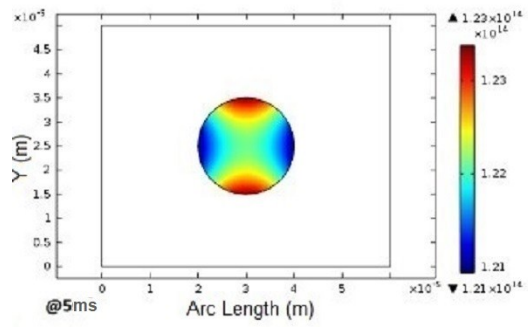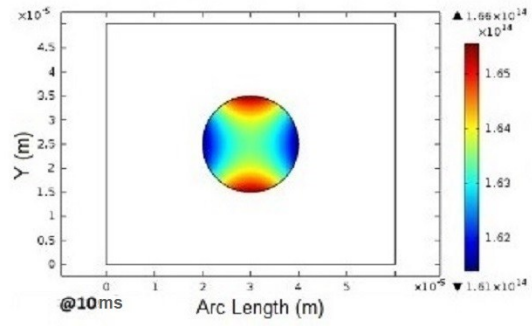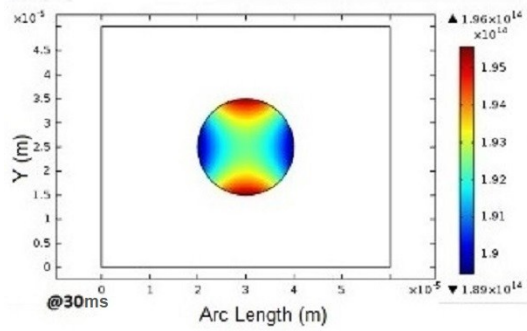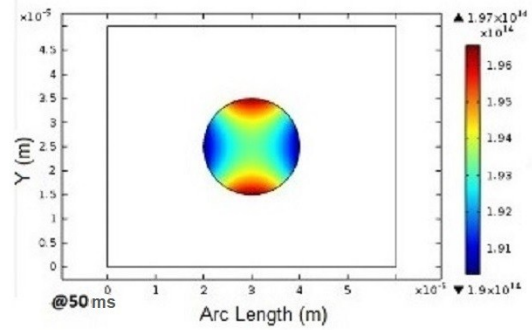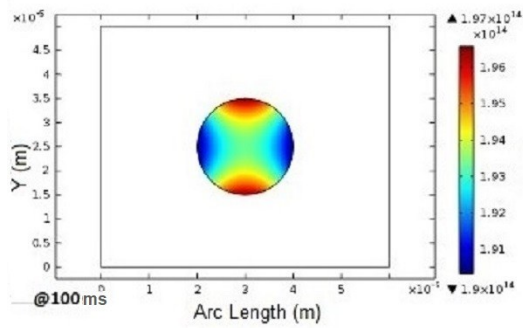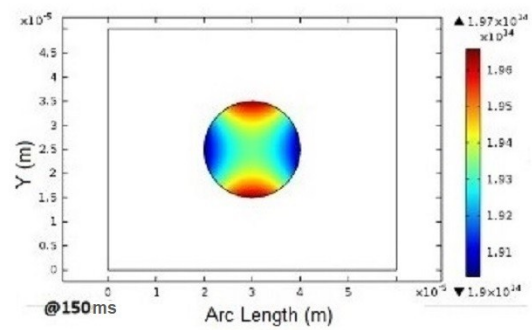

Supplementary Figure 7: Time of applied pulse Vs Pore densities analysis on MCF-7 Breast cancer cell.

Appendix A:

With the help of Gauss's law eq.1 we obtain Poisson equation eq.2. and with the help of Poisson equation we obtain Laplace equation eq.3.

$$\nabla \cdot \mathbf{D} = \rho_v \quad (1)$$

$$\nabla^2 V = \frac{\partial^2 V}{\partial x^2} + \frac{\partial^2 V}{\partial y^2} + \frac{\partial^2 V}{\partial z^2} = -\frac{\rho}{\epsilon} \quad (2)$$

$$\nabla^2 V = \frac{\partial^2 V}{\partial x^2} + \frac{\partial^2 V}{\partial y^2} + \frac{\partial^2 V}{\partial z^2} = 0 \quad (3)$$

We have to find potential at five different regions as you can see from the figure

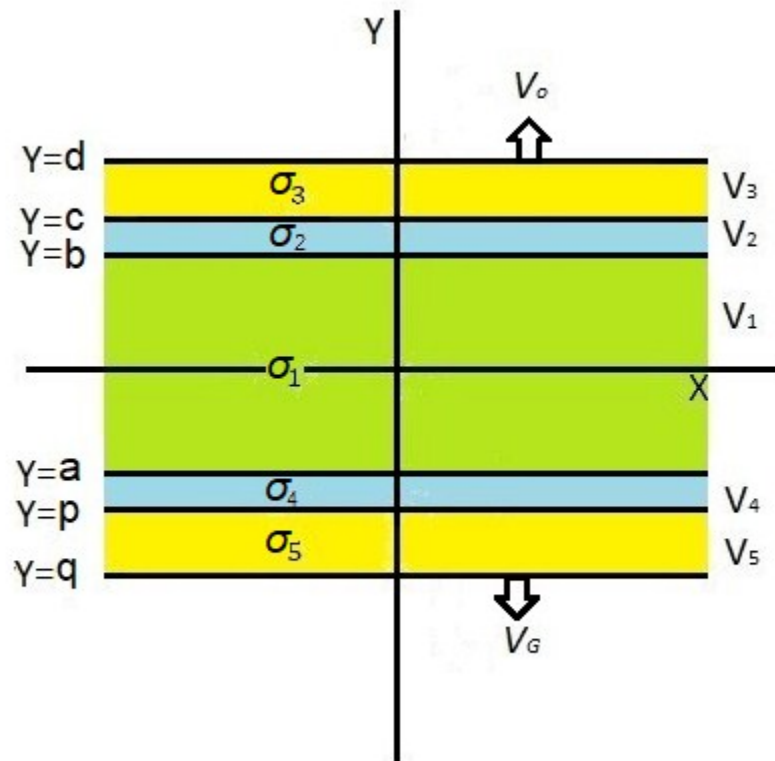

By integrating equation twice as; for all five regions we get (its only the function of y)

$$\iint (\nabla^2 V_1) dy dy = \iint (0) dy dy$$

$$\int \nabla V_1 dy = \int A dy$$



$$V_1 = AY + B$$

For our own convenience we replace a notation  $Y$  by  $x$ . And we get;

$$V_1 = Ax + B \quad (4)$$

We did the same for remaining four regions and we get

$$V_2 = Cx + D \quad (5)$$

$$V_3 = Fx + G \quad (6)$$

$$V_4 = Hx + J \quad (7)$$

$$V_5 = Mx + N \quad (8)$$

In this calculation we represent the conductivity of different regions with  $\sigma$ .

As the figure above shows the biological cell replica when we join region 2 & 4 and 3 & 5 circularly then they form cell membrane and cell exterior (cell medium) respectively that is why in these regions the conductivity is same which shows:

$$\sigma_3 = \sigma_5$$

$$\sigma_2 = \sigma_4$$

As we have ten unknowns so the ten boundary conditions are

$$V_5(Q) = V_G \quad (i)$$

$$V_3 = V_O \quad (ii)$$

$$V_1(b) = V_2(b) \quad (iii) \text{ So, } D_1 = D_2 \Rightarrow \sigma_1 E_1 = \sigma_2 E_2$$

$$E_1 = -\nabla V_1 \Rightarrow -\nabla(Ax + B) = -A$$

$$\therefore E_2 = -C$$

$$\therefore D_1 = D_2 \Rightarrow \sigma_1 A = \sigma_2 C \quad (iv)$$

Did same for remaining

$$V_1(a) = V_4(a) \quad (v)$$

$$D_1 = D_4 \Rightarrow \sigma_1 A = \sigma_2 H \quad (vi)$$

$$V_2(c) = V_3(c) \quad (vii)$$

$$D_2 = D_3 \Rightarrow \sigma_2 C = \sigma_3 F \quad (viii)$$

$$V_4(P) = V_5(P) \quad (ix)$$

$$D_4 = D_5 \Rightarrow \sigma_2 H = \sigma_3 M \quad (x)$$

By (iv) & (vi)

$$\sigma_2 C = \sigma_2 H$$

$$C = H \quad (a)$$

By (viii) & (x) by using (a)

$$F = M \quad (b)$$

From (iv)

$$C = \frac{\sigma_1}{\sigma_2} A = H$$

$$F = \frac{\sigma_1}{\sigma_3} A = M$$

By equation (i)(ii)(4) to (8)

$$V_G = M.Q + N$$

$$V_o = F.d + G$$

$$A.b + B = C.b + D$$

$$A.a + B = H.a + J$$

$$C.c + D = F.c + G$$

$$H.P + J = M.P + N$$

by putting the values of F, M, C, H in above equations

$$N = V_G - \frac{\sigma_1}{\sigma_3} A . Q \quad (9)$$

$$G = V_o - \frac{\sigma_1}{\sigma_3} A . d \quad (10)$$

$$A . b + B = \frac{\sigma_1}{\sigma_2} A . b + D \quad (11)$$

$$A . a + B = \frac{\sigma_1}{\sigma_2} A . a + J \quad (12)$$

$$\frac{\sigma_1}{\sigma_2} A . c + D = \frac{\sigma_1}{\sigma_3} A . c + G \quad (13)$$

$$\frac{\sigma_1}{\sigma_2} A . P + J = \frac{\sigma_1}{\sigma_3} A . P + N \quad (14)$$

Putting (9) in (14)

$$\frac{\sigma_1}{\sigma_2} A . P + J = \frac{\sigma_1}{\sigma_3} A . P + V_G - \frac{\sigma_1}{\sigma_3} A . Q$$

$$J = A . \left( \frac{\sigma_1}{\sigma_3} . P - \frac{\sigma_1}{\sigma_3} . Q - \frac{\sigma_1}{\sigma_2} . P \right) + V_G \quad (14a)$$

Putting (10) in (13)

$$D = A . \left( \frac{\sigma_1}{\sigma_3} . c - \frac{\sigma_1}{\sigma_3} . d - \frac{\sigma_1}{\sigma_2} . c \right) + V_o \quad (13a)$$

Putting (13a) in (11)

$$A . b + B = \frac{\sigma_1}{\sigma_2} A . b + A . \left( \frac{\sigma_1}{\sigma_3} . c - \frac{\sigma_1}{\sigma_3} . d - \frac{\sigma_1}{\sigma_2} . c \right) + V_o$$

$$B = A . \left( \frac{\sigma_1}{\sigma_3} . c - \frac{\sigma_1}{\sigma_3} . d - \frac{\sigma_1}{\sigma_2} . c - b + \frac{\sigma_1}{\sigma_2} . b \right) + V_o \quad (11a)$$

Putting (11a) & (14a) in (12)

$$A . a + A . \left( \frac{\sigma_1}{\sigma_3} . c - \frac{\sigma_1}{\sigma_3} . d - \frac{\sigma_1}{\sigma_2} . c - b + \frac{\sigma_1}{\sigma_2} . b \right) + V_o = \frac{\sigma_1}{\sigma_2} A . a + A . \left( \frac{\sigma_1}{\sigma_3} . P - \frac{\sigma_1}{\sigma_3} . Q - \frac{\sigma_1}{\sigma_2} . P \right) + V_G$$

$$A = \frac{V_o - V_G}{\left( \frac{\sigma_1}{\sigma_2} . a + \frac{\sigma_1}{\sigma_3} . P - \frac{\sigma_1}{\sigma_3} . Q - \frac{\sigma_1}{\sigma_2} . P - \frac{\sigma_1}{\sigma_3} . c + \frac{\sigma_1}{\sigma_3} . d + \frac{\sigma_1}{\sigma_2} . c - \frac{\sigma_1}{\sigma_2} . b + b - a \right)} \quad (15)$$

Now all the unknown variables are:

∴

$$A = \frac{V_o - V_G}{\left( \frac{\sigma_1}{\sigma_2} . a + \frac{\sigma_1}{\sigma_3} . P - \frac{\sigma_1}{\sigma_3} . Q - \frac{\sigma_1}{\sigma_2} . P - \frac{\sigma_1}{\sigma_3} . c + \frac{\sigma_1}{\sigma_3} . d + \frac{\sigma_1}{\sigma_2} . c - \frac{\sigma_1}{\sigma_2} . b + b - a \right)}$$

$$B = A . \left( \frac{\sigma_1}{\sigma_3} . c - \frac{\sigma_1}{\sigma_3} . d - \frac{\sigma_1}{\sigma_2} . c - b + \frac{\sigma_1}{\sigma_2} . b \right) + V_o$$

$$C = \frac{\sigma_1}{\sigma_2} A$$

$$D = A . \left( \frac{\sigma_1}{\sigma_3} . c - \frac{\sigma_1}{\sigma_3} . d - \frac{\sigma_1}{\sigma_2} . c \right) + V_o$$

$$F = \frac{\sigma_1}{\sigma_3} A$$

$$G = V_o - \frac{\sigma_1}{\sigma_3} A . d$$

$$H = \frac{\sigma_1}{\sigma_2} A$$

$$J = A . \left( \frac{\sigma_1}{\sigma_3} . P - \frac{\sigma_1}{\sigma_3} . Q - \frac{\sigma_1}{\sigma_2} . P \right) + V_G$$

$$M = \frac{\sigma_1}{\sigma_3} A$$

$$N = V_G - \frac{\sigma_1}{\sigma_3} A . Q$$
